# Supplementary material
Source: MDPI journal article supplement (https://www.mdpi.com/2673-6756/3/3/31)
Supplement: s1 [file s1]

Supplementary Table S1: ANI values for *Bacillus cereus sensu lato* species determination.

|                                                                | <i>Bacillus toyonensis</i> | <i>Bacillus weihenstephensis</i> | <i>Bacillus mycoides</i> | <i>Bacillus thuringiensis</i> | sample 6 | <i>Bacillus cereus</i> s. – cereulide | <i>Bacillus mobilis</i> | <i>Bacillus wiedmanii</i> | sample 14 | <i>Bacillus anthracis</i> Sterne | <i>Bacillus anthracis</i> Ames | <i>Bacillus paranthracis</i> | <i>Bacillus cereus</i> s.s + cereulide | <i>Bacillus pseudomycolides</i> | <i>Bacillus cytotoxicus</i> |
|----------------------------------------------------------------|----------------------------|----------------------------------|--------------------------|-------------------------------|----------|---------------------------------------|-------------------------|---------------------------|-----------|----------------------------------|--------------------------------|------------------------------|----------------------------------------|---------------------------------|-----------------------------|
| <i>Bacillus toyonensis</i>                                     | 100.00                     | 90.63                            | 90.83                    | 91.76                         | 91.73    | 91.78                                 | 91.06                   | 91.43                     | 91.13     | 91.15                            | 91.12                          | 90.96                        | 91.03                                  | 83.53                           | 82.55                       |
| <i>Bacillus weihenstephensis</i>                               | 90.63                      | 100.00                           | 93.69                    | 89.41                         | 89.45    | 89.47                                 | 90.19                   | 90.52                     | 89.58     | 89.49                            | 89.51                          | 89.45                        | 89.38                                  | 83.84                           | 82.46                       |
| <i>Bacillus mycoides</i>                                       | 90.83                      | 93.69                            | 100.00                   | 89.91                         | 89.89    | 89.93                                 | 90.83                   | 91.07                     | 90.09     | 90.05                            | 90.03                          | 89.92                        | 89.96                                  | 83.67                           | 82.54                       |
| <i>Bacillus thuringiensis</i>                                  | 91.76                      | 89.41                            | 89.91                    | 100.00                        | 96.80    | 96.76                                 | 91.15                   | 91.41                     | 91.53     | 91.42                            | 91.51                          | 91.53                        | 91.47                                  | 83.32                           | 82.46                       |
| sample 6                                                       | 91.73                      | 89.45                            | 89.89                    | 96.80                         | 100.00   | 98.84                                 | 91.20                   | 91.49                     | 91.83     | 91.78                            | 91.73                          | 91.92                        | 91.94                                  | 83.30                           | 82.49                       |
| <i>Bacillus cereus sensu stricto</i> - non cereulide-producing | 91.78                      | 89.47                            | 89.93                    | 96.76                         | 98.84    | 100.00                                | 91.17                   | 91.47                     | 91.80     | 91.82                            | 91.80                          | 91.96                        | 92.00                                  | 83.34                           | 82.69                       |
| <i>Bacillus mobilis</i>                                        | 91.06                      | 90.19                            | 90.83                    | 91.15                         | 91.20    | 91.17                                 | 100.00                  | 94.63                     | 93.18     | 92.87                            | 92.92                          | 92.96                        | 93.14                                  | 83.31                           | 82.37                       |
| <i>Bacillus wiedmanii</i>                                      | 91.43                      | 90.52                            | 91.07                    | 91.41                         | 91.49    | 91.47                                 | 94.63                   | 100.00                    | 93.12     | 93.11                            | 93.08                          | 93.10                        | 93.09                                  | 83.43                           | 82.48                       |
| sample 14                                                      | 91.13                      | 89.58                            | 90.09                    | 91.53                         | 91.83    | 91.80                                 | 93.18                   | 93.12                     | 100.00    | 98.41                            | 98.62                          | 95.44                        | 95.14                                  | 83.48                           | 82.66                       |
| <i>Bacillus anthracis</i> str Sterne                           | 91.15                      | 89.49                            | 90.05                    | 91.42                         | 91.78    | 91.82                                 | 92.87                   | 93.11                     | 98.41     | 100.00                           | 99.99                          | 95.27                        | 95.07                                  | 83.43                           | 82.89                       |
| <i>Bacillus anthracis</i> str Ames                             | 91.12                      | 89.51                            | 90.03                    | 91.51                         | 91.73    | 91.80                                 | 92.92                   | 93.08                     | 98.62     | 99.99                            | 100.00                         | 95.32                        | 95.17                                  | 83.39                           | 82.84                       |
| <i>Bacillus paranthracis</i>                                   | 90.96                      | 89.45                            | 89.92                    | 91.53                         | 91.92    | 91.96                                 | 92.96                   | 93.10                     | 95.44     | 95.27                            | 95.32                          | 100.00                       | 97.52                                  | 83.29                           | 82.50                       |
| <i>Bacillus cereus sensu stricto</i> -                         | 91.03                      | 89.38                            | 89.96                    | 91.47                         | 91.94    | 92.00                                 | 93.14                   | 93.09                     | 95.14     | 95.07                            | 95.17                          | 97.52                        | 100.00                                 | 83.36                           | 82.67                       |

|                                                                    |       |       |       |       |       |       |       |       |       |       |       |       |       |        |        |
|--------------------------------------------------------------------|-------|-------|-------|-------|-------|-------|-------|-------|-------|-------|-------|-------|-------|--------|--------|
| cereulide<br>producing<br><i>Bacillus</i><br><i>pseudomycoides</i> | 83.53 | 83.84 | 83.67 | 83.32 | 83.30 | 83.34 | 83.31 | 83.43 | 83.48 | 83.43 | 83.39 | 83.29 | 83.36 | 100.00 | 83.26  |
| <i>Bacillus</i><br><i>cytotoxicus</i>                              | 82.55 | 82.46 | 82.54 | 82.46 | 82.49 | 82.69 | 82.37 | 82.48 | 82.66 | 82.89 | 82.84 | 82.50 | 82.67 | 83.26  | 100.00 |

**Supplementary Table S2: Determination of the species, toxin genes and plasmid of the two *Bacillus cereus* s. l. isolates.**

| Isolate   | Species identification      | Enterotoxin producing genes            | <i>ces</i> cluster (cereulide) | <i>Bacillus anthracis</i> core pathogenic factors ( <i>pagA</i> , <i>lef</i> , <i>cya</i> genes) | pXO1 | pXO2 |
|-----------|-----------------------------|----------------------------------------|--------------------------------|--------------------------------------------------------------------------------------------------|------|------|
| sample 6  | <i>Bacillus cereus</i> s.s. | <i>nhe</i> , <i>hbl</i> , <i>cytK2</i> | -                              | -                                                                                                | -    | -    |
| sample 14 | <i>Bacillus anthracis</i>   | <i>nhe</i> , <i>hbl</i> , <i>cytK2</i> | -                              | -                                                                                                | -    | -    |

**Supplementary Table S3: Metadata on the reference genomes used for species determination.**

| Species                              | Strain                                | RefSeq Accession |
|--------------------------------------|---------------------------------------|------------------|
| <i>Bacillus anthracis</i>            | Ames                                  | GCF_000007845.1  |
| <i>Bacillus anthracis</i>            | Sterne                                | GCF_000832635.1  |
| <i>Bacillus cereus sensu stricto</i> | ATCC 14579; non-cereulide producing   | GCF_000007825.1  |
| <i>Bacillus cereus sensu stricto</i> | F4810/72 (AH187); cereulide-producing | GCF_000021225.1  |
| <i>Bacillus cytotoxicus</i>          | NVH 391-98                            | GCF_000017425.1  |
| <i>Bacillus mobilis</i>              | 0711P9-1                              | GCF_001884045.1  |
| <i>Bacillus mycoides</i>             | DSM 2048                              | GCF_000003925.1  |
| <i>Bacillus paranthracis</i>         | MN5                                   | GCF_001883995.1  |
| <i>Bacillus pseudomyoides</i>        | DSM 12442                             | GCF_000161455.1  |
| <i>Bacillus thuringiensis</i>        | Serovar Berliner (ATCC 10792)         | GCF_000161615.1  |
| <i>Bacillus toyonensis</i>           | BCT-7112                              | GCF_000496285.1  |
| <i>Bacillus weihenstephanensis</i>   | WSBC 10204                            | GCF_000775975.1  |
| <i>Bacillus wiedmannii</i>           | FSL W8-0169                           | GCF_001583695.1  |

Supplementary Table S4: real-time PCR and phenotypical analysis of stain in sample 14

|                                 | real-time PCR<br><i>pagA</i> | real-time PCR<br><i>capC</i> | growth<br>on<br>PLET<br>medium | gamma<br>phage | hemolyse           | Penicilin<br>resistance |
|---------------------------------|------------------------------|------------------------------|--------------------------------|----------------|--------------------|-------------------------|
| <i>B. anthracis</i><br>(Sterne) | amplification                | amplification                | positive                       | lysis          | negative           | no                      |
| <i>sample 14</i>                | no amplification             | no amplification             | negative                       | no lysis       | beta-<br>hemolysis | yes                     |
